# Supplementary material for: Enhanced thermoelectric performance in TiNiSn-based half-Heuslers
Source: Royal Society of Chemistry journal article supplement (doi:10.1039/c2cc37121a), 2012-12-18

Supplementary Information for

**Enhanced thermoelectric performance in TiNiSn-based half-Heuslers**

R.A. Downie,<sup>a</sup> D.A. MacLaren,<sup>b</sup> R.I. Smith<sup>c</sup> and J.W.G. Bos<sup>a</sup>

<sup>a</sup> *Institute of Chemical Sciences and Centre for Advanced Energy Storage and Recovery, School of Engineering and Physical Sciences, Heriot-Watt University, Edinburgh, UK, EH14 4AS.*

<sup>b</sup> *School of Physics and Astronomy, University of Glasgow, Glasgow, UK, G12 8QQ.*

<sup>c</sup> *ISIS Facility, Rutherford Appleton Laboratory, Harwell Oxford, Didcot, UK, OX11 0QX.*

Table S1. Refined lattice parameters (*a*), phase fraction (*f*), microstrain (*S*) and goodness-of-fit ( $\chi^2$ ) for the arc-melted  $\text{Ti}_{1-x}\text{Zr}_x\text{NiSn}_{0.95}$  phases.

| <i>x</i> | <i>a</i> (Å) | <i>f</i> | <i>S</i> (%) <sup>a</sup> | $\chi^2$ |
|----------|--------------|----------|---------------------------|----------|
| 0        | 5.9293(1)    | 0.34(1)  | 0                         | 2.9      |
|          | 5.9354(1)    | 0.66(1)  | 0.02(1)                   |          |
| 0.05     | 5.9459(2)    | 0.16(1)  | 0.01(1)                   | 2.6      |
|          | 5.9501(1)    | 0.84(1)  | 0                         |          |
| 0.5      | 5.9909(1)    | 0.23(1)  | 0.70(1)                   | 2.4      |
|          | 6.0301(1)    | 0.10(1)  | 0.70(1)                   |          |
|          | 6.0612(1)    | 0.67(1)  | 0.30(2)                   |          |
| 1        | 6.1085(1)    | 0.08(1)  | 0                         | 2.5      |
|          | 6.1148(1)    | 0.92(1)  | 0                         |          |

<sup>a</sup> microstrain:  $S$  (%) =  $\pi/0.18$  (LY-LY<sub>i</sub>); LY<sub>i</sub> = 0.08°; GW fixed at 0.12°, LY<sub>i</sub> = instrumental contribution taken from *x* = 0 sample.

Fig. S1. Laboratory X-ray powder diffraction patterns for the arc-melted  $\text{Ti}_{1-x}\text{Zr}_x\text{NiSn}_{0.95}$  samples after two weeks of annealing at 900 °C. Data were collected over a period of 8 hours on a Bruker D8 Advance diffractometer with monochromated  $\text{Cu K}\alpha_1$  radiation. Small amounts of full-Heusler (\*) and  $\text{Ti}_5\text{Sn}_3$  (#) remain after prolonged annealing.

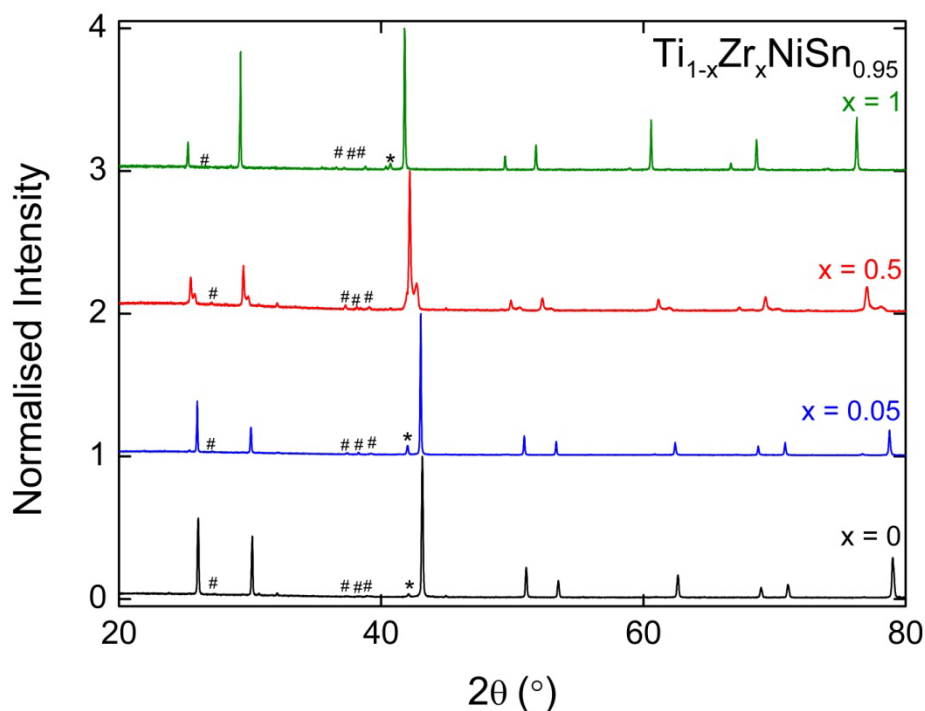

Fig. S2. Thermoelectric power factor ( $S^2/\rho$ ) for the  $\text{Ti}_{1-x}\text{Zr}_x\text{NiSn}_{0.95}$  samples.

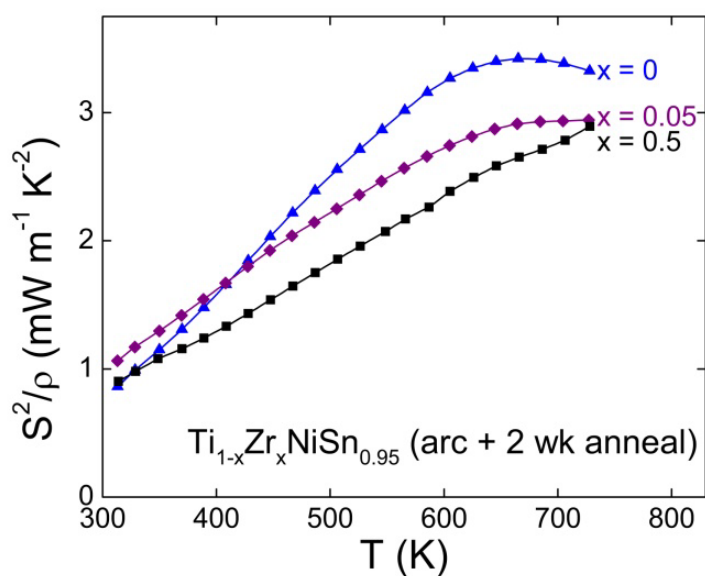

Fig. S3. Rietveld fit to Polaris neutron powder diffraction data for the nominally stoichiometric TiNiSn sample. Prepared by arc-melting and annealing for two weeks at 900 °C. Top markers (blue) are for Ti<sub>5</sub>Sn<sub>3</sub> (2.3(1) wt%), middle markers (red) are for TiNi<sub>1.76(2)</sub>Sn (4.7(2) wt%), and bottom markers are for TiNi<sub>1.036(1)</sub>Sn.

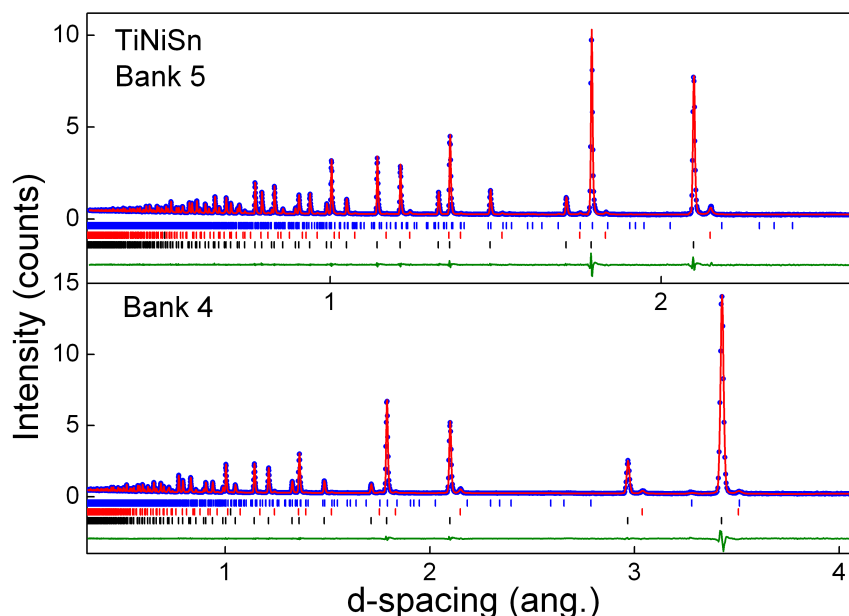

Table S2. Refined structural parameters for nominally stoichiometric TiNiSn from the Rietveld fit against Polaris neutron powder diffraction data.

|     | Wyckoff | x    | y    | z    | occupancy | U <sub>iso</sub> (Å <sup>2</sup> ) |
|-----|---------|------|------|------|-----------|------------------------------------|
| Ti  | 4a      | 0    | 0    | 0    | 1.002(2)  | 0.00478(7)                         |
| Ni1 | 4c      | 0.25 | 0.25 | 0.25 | 1.000(3)  | 0.00525(5)                         |
| Ni2 | 4d      | 0.75 | 0.75 | 0.75 | 0.036(3)  | 0.00426(5)                         |
| Sn  | 4b      | 0.5  | 0.5  | 0.5  | 1.000(2)  | 0.00525(5)                         |

Space group F-43m, a = 5.9327(1) Å; Final fit statistics:  $\chi^2 = 6.5$ ; Bank 5: wR<sub>p</sub> = 2.5%, R<sub>p</sub> = 3.8%; Bank 4: wR<sub>p</sub> = 1.9%, R<sub>p</sub> = 3.6%; Bank 3: wR<sub>p</sub> = 2.5%, R<sub>p</sub> = 3.1%. The sample contains TiNi<sub>1.76(2)</sub>Sn impurity (4.7(2) wt%, a = 6.0753(3) Å) and Ti<sub>5</sub>Sn<sub>3</sub> (2.3(1) wt%) impurities.

Fig. S4. Temperature dependence of the electrical resistivity ( $\rho$ ), Seebeck coefficient ( $S$ ), power factor ( $S^2/\rho$ ), the total ( $\kappa$ ) and lattice thermal conductivities ( $\kappa_{\text{lat}} = \kappa - LT/\rho$ ;  $L = 2.4 \times 10^{-8} \text{ W } \Omega \text{ K}^{-2}$ ), and the thermoelectric figure of merit ( $ZT$ ) for the arc-melted nominally stoichiometric TiNiSn sample.

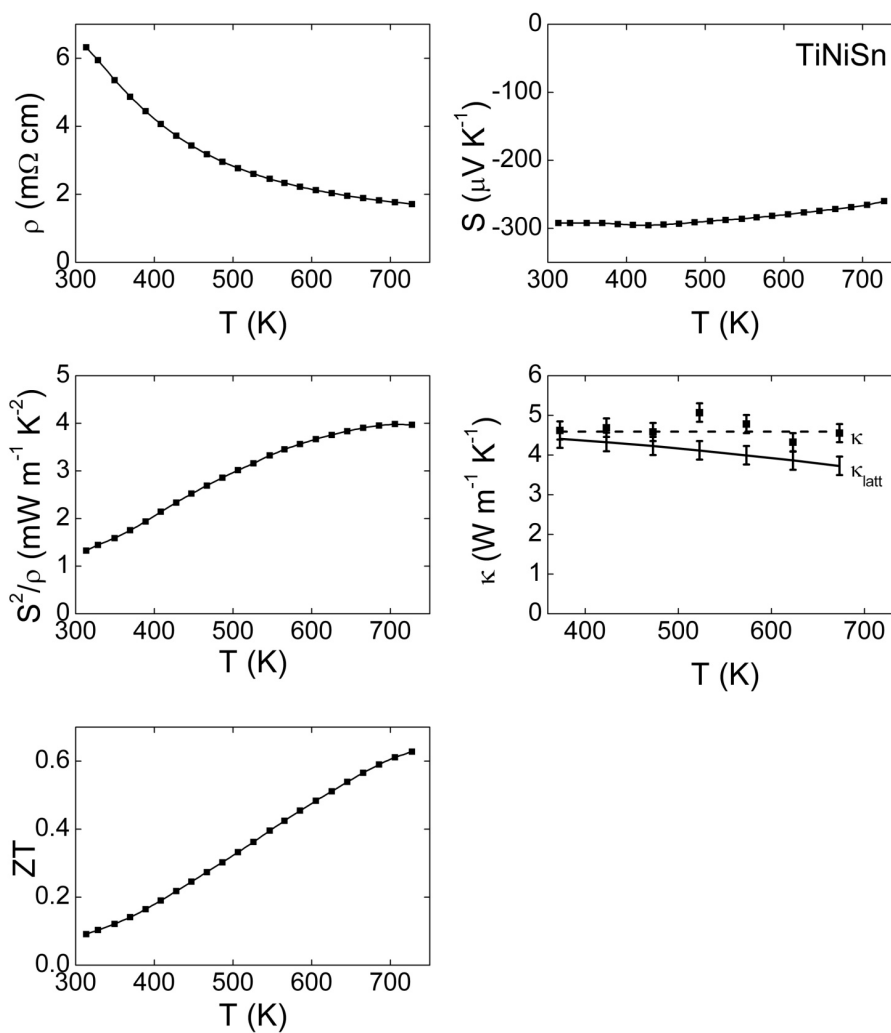

Supplement: c2cc37121a.pdf [file c2cc37121a.pdf]
